# Supplementary material
Source: publisher figshare collection journal article supplement (https://acs.figshare.com/ndownloader/files/3812680)
Supplement: Supplementary file 1 [file 3812680]

## SUPPORTING INFORMATION

### Spectroscopic and Redox Studies of Valence-Delocalized $[\text{Fe}_2\text{S}_2]^+$ Centers in Thioredoxin-Like Ferredoxins

Sowmya Subramanian, Evert C. Duin, Sarah E. J. Fawcett, Fraser A. Armstrong, Jacques Meyer, and Michael K. Johnson

Figure S1: UV-visible absorption spectra of oxidized and dithionite-reduced WT *AaeFd4* at pH 7.0 and 11.0.

Figure S2: Film voltammograms of C56S *CpFd* at pH 7.2 and 9.8

Figure S3: Film voltammetry oxidative and reductive half-height peak widths ( $\delta$ ) for of C56S *CpFd* at pH 7.2 and 9.8 as a function of scan rate.

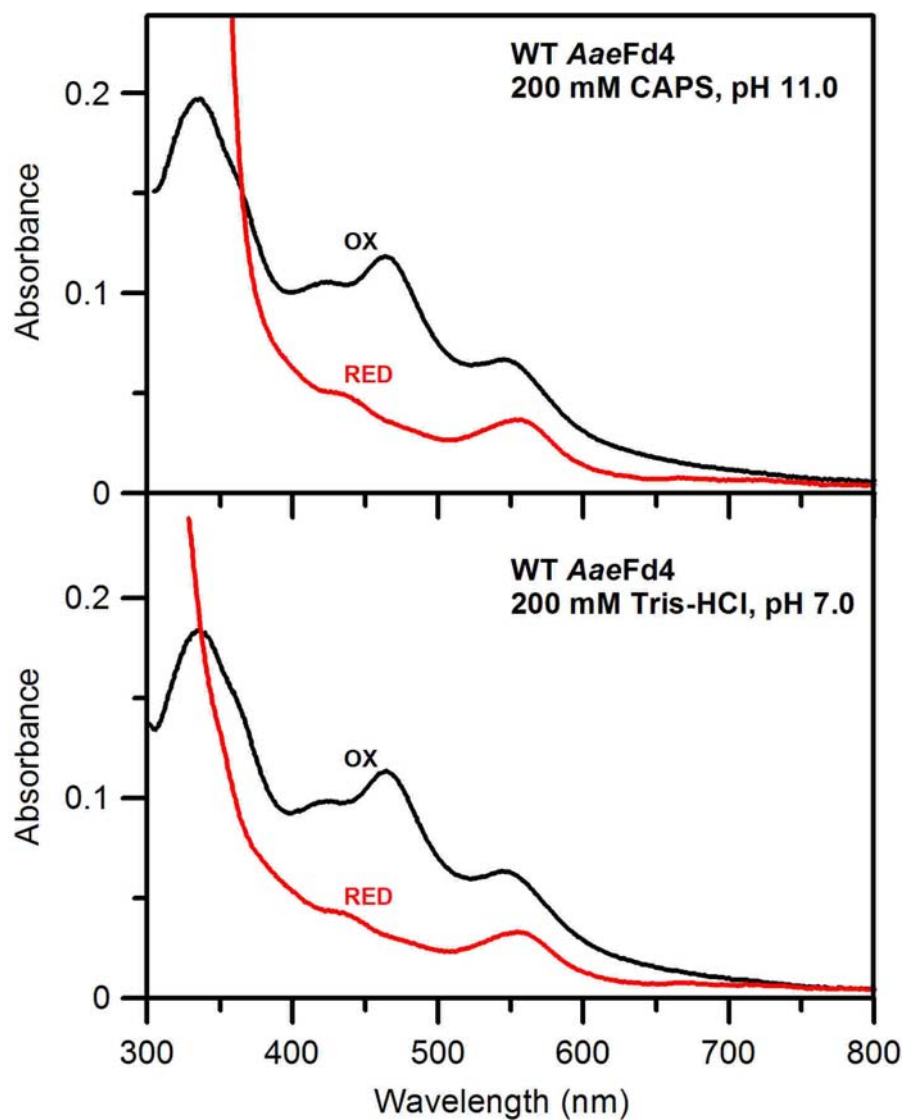

**Figure S1.** UV-visible absorption spectra of oxidized and dithionite-reduced WT *AaeFd4* (0.12 mM) in 200 mM CAPS buffer with 0.1 M NaCl at pH 11.0, and in 200 mM Tris-HCl buffer with 0.1 M NaCl at pH 7.0, recorded in 0.1 cm cuvettes.

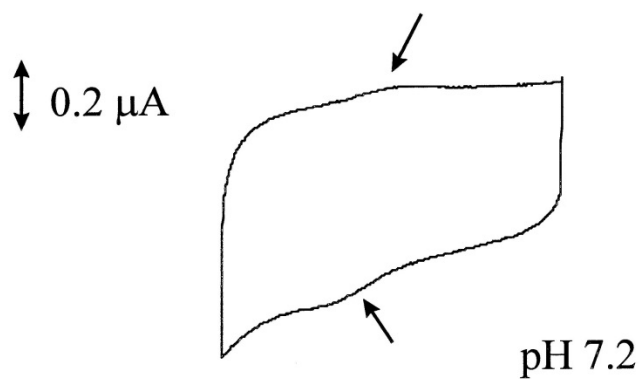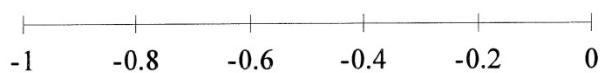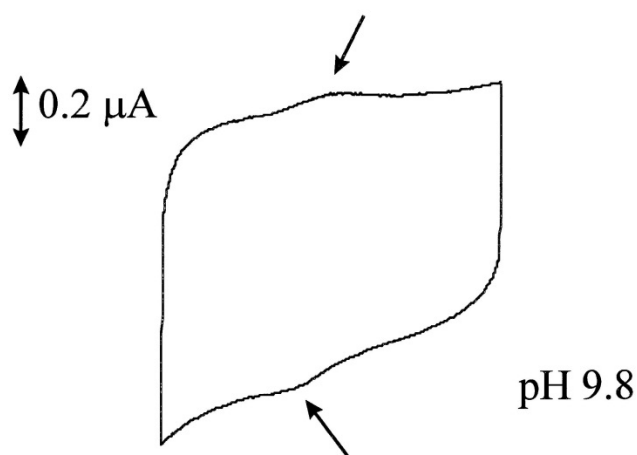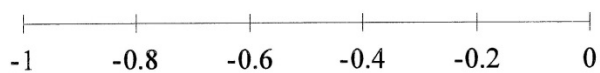

E/V SHE

**Figure S2.** Film voltammograms of C56S CpFd at pH 7.2 and 9.8. Protein concentration ~0.1 mM in 20 mM mixed buffer (pH range 6.5-10.5) with 0.1 M NaCl and 200 μg mL<sup>-1</sup> polymyxin as coadsorbate. Voltammograms were recorded with a scan rate of 10 mV s<sup>-1</sup> at 0 °C. Very similar voltammograms were observed for C60S CpFd under analogous conditions.

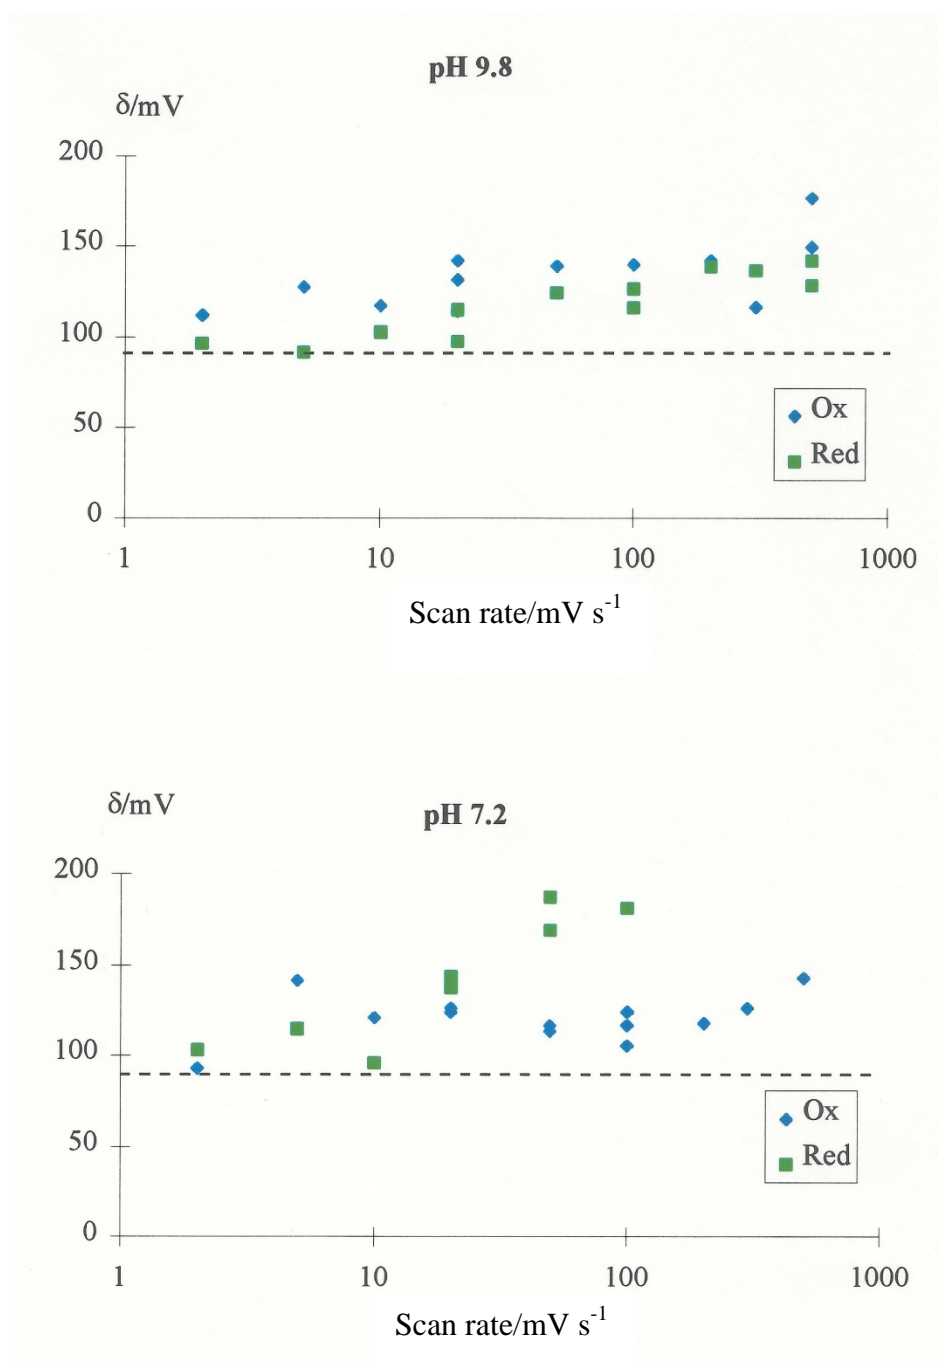

**Figure S3:** Film voltammetry oxidative and reductive half-height peak widths ( $\delta$ ) for of C56S CpFd at pH 7.2 and 9.8 as a function of scan rate. Conditions are the same as described in Figure S2. The dashed line indicates the ideal value of  $\delta = 84$  mV. The reductive wave peaks were too broad to observe with scan rates  $> 100$  mV s<sup>-1</sup> at pH = 7.2. The broader and more asymmetrical voltammetric waves that are observed at pH 7.2 are tentatively attributed to coupling to a ligand exchange reaction. Very similar results were observed for C60S CpFd under analogous conditions.
